# Supplementary material
Source: PubMed Central journal article supplement (PMC11324160)
Supplement: JGMED24001571.pdf [file JGMED24001571.pdf]

**Supplementary Data**

**TABLE 1**

Residency Orientation (Vanderbilt University Medical Center) Session Titles and Roles of Presenters

| <b>Session Title</b>                                                                                                                      | <b>Role(s) of Presenter(s)</b>                                                                                                                                                                                            |
|-------------------------------------------------------------------------------------------------------------------------------------------|---------------------------------------------------------------------------------------------------------------------------------------------------------------------------------------------------------------------------|
| VUMC and Nashville History of Race and Racism ( <i>45 minutes, large group setting</i> )                                                  | Vice Chancellor for Equity, Diversity, and Inclusion<br>Chief Diversity Officer, Professor of Medicine, Professor of Biomedical Engineering and Radiology and Radiologic Sciences                                         |
| Prioritizing Racial Equity and Anti-Racism in Health Care ( <i>45 minutes, large group</i> )                                              | Senior Vice President for Health Equity and Inclusive Excellence<br>Senior Associate Dean for Health Equity and Inclusive                                                                                                 |
| Diverse Nashville: More than Black and White ( <i>45 minutes, large group setting</i> )                                                   | Vice Chair for Diversity and Inclusion, Professor of Medicine                                                                                                                                                             |
| Introduction to GOL2D and Systems Thinking ( <i>30 minutes, large group setting</i> )                                                     | Associate Professor of Clinical Medicine                                                                                                                                                                                  |
| Introduction to Leadership ( <i>45 minutes, large group setting</i> )                                                                     | Assistant Professor of Otolaryngology, Head and Neck Surgery<br>Residency Program Director                                                                                                                                |
| Seeds of Equity ( <i>30 minutes, large group setting</i> )                                                                                | Office of Health Equity                                                                                                                                                                                                   |
| Neighborhoods of Nashville ( <i>1 hour, large group setting</i> )                                                                         | Senior Project Manager                                                                                                                                                                                                    |
| Addressing Patient’s Social Determinants of Health: Virtual Visits at VUMC and in the Community ( <i>1.5 hours, large group setting</i> ) | Shade Tree Clinic; VIVID Health; Open Table Nashville; Second Harvest Foodbank of Nashville, Tennessee Department of Health, Tennessee Justice Center; Room In The Inn - Nashville; VUMC Bridge Clinic; and Siloam Health |
| Words Matter: Developing a Shared Language/Definitions (Video) ( <i>10 minutes, large group setting</i> )                                 | Assistant Professor of Emergency Medicine                                                                                                                                                                                 |

**TABLE 2**

Residency Orientation (University of Mississippi Medical Center) Session Titles and Roles of Presenters

| Session Title                                                                                                                                                                                                                                                                                                                                                                                                                                                                                                                                                                                                                                                                                                                                                        | Role(s) of Presenter(s)                                                                                                                                                                                            |
|----------------------------------------------------------------------------------------------------------------------------------------------------------------------------------------------------------------------------------------------------------------------------------------------------------------------------------------------------------------------------------------------------------------------------------------------------------------------------------------------------------------------------------------------------------------------------------------------------------------------------------------------------------------------------------------------------------------------------------------------------------------------|--------------------------------------------------------------------------------------------------------------------------------------------------------------------------------------------------------------------|
| <p>Structural Competency in Orientation and Residency Experiences (S.C.O.R.E. ) Overview (15 minutes, large group setting)</p> <p>-Diverse Patient Populations (Dimensions of Diversity, Intersectionality &amp; Provider Connection, Diversifying Health Professions &amp; Patient Outcomes)</p> <p>Common Terminology (Terms in Academic Medicine, Racism-Impact on Society &amp; Patient Care, Respect)</p> <p>Structural Competence, Part 1 (Civil Rights &amp; Healthcare, Social Determinants of Health, Cultural Competency/Cultural Humility)</p> <p>Structural Competence, Part 2 (Goals of Structural Competency Framework, Health Equity)</p> <p>Structural Competence, Part 3 (Community building, Structural Interventions, Social Needs Resources)</p> | <p>Chief Diversity and Inclusion Officer, Professor of Health Administration, School of Health-Related Professions</p> <p>Assistant Professor of Medicine</p> <p>Assistant Professor, Child Development Clinic</p> |
| <p>Health Equity &amp; EversCare Clinic Overview (15 minutes, large group setting)</p> <p>-EversCare structure and mission</p> <p>-Patient Care Populations</p> <p>-Health Disparities</p> <p>-Social Determinants of Health</p>                                                                                                                                                                                                                                                                                                                                                                                                                                                                                                                                     | <p>Assistant Dean for Student Affairs<br/>Executive Director, Myrlie Evers-Williams Institute for the Elimination of Health Disparities</p>                                                                        |
| <p>Health System Science Overview (15 minutes, large group setting)</p> <p>-Structure and Process</p> <p>-Health System Improvement</p>                                                                                                                                                                                                                                                                                                                                                                                                                                                                                                                                                                                                                              | <p>Associate Professor of Medicine, Associate Program Director</p>                                                                                                                                                 |

|                                                                                                                                                                                                                                                                                                          |                                                                                                                                                                                                                                                                                                        |
|----------------------------------------------------------------------------------------------------------------------------------------------------------------------------------------------------------------------------------------------------------------------------------------------------------|--------------------------------------------------------------------------------------------------------------------------------------------------------------------------------------------------------------------------------------------------------------------------------------------------------|
| <p>-Population, Public, and Social Determinants of Health</p>                                                                                                                                                                                                                                            |                                                                                                                                                                                                                                                                                                        |
| <p>S.C.O.R.E. Case Studies and Discussion (<i>45 minutes, large group setting</i>)<br/>                 -Residents are grouped in differing specialties and given case scenarios in which they must together formulate a patient care plan for each scenario.<br/>                 -Group Discussion</p> | <p>Chief Diversity and Inclusion Officer, Professor of Health Administration, School of Health-Related Professions<br/><br/>                 Assistant Dean for Student Affairs<br/>                 Executive Director, Myrlie Evers-Williams Institute for the Elimination of Health Disparities</p> |
